# Supplementary material
Source: PubMed Central journal article supplement (PMC2490786)
Supplement: M803629200_1.pdf [file M803629200_1.pdf]

Supplemental Fig. 1

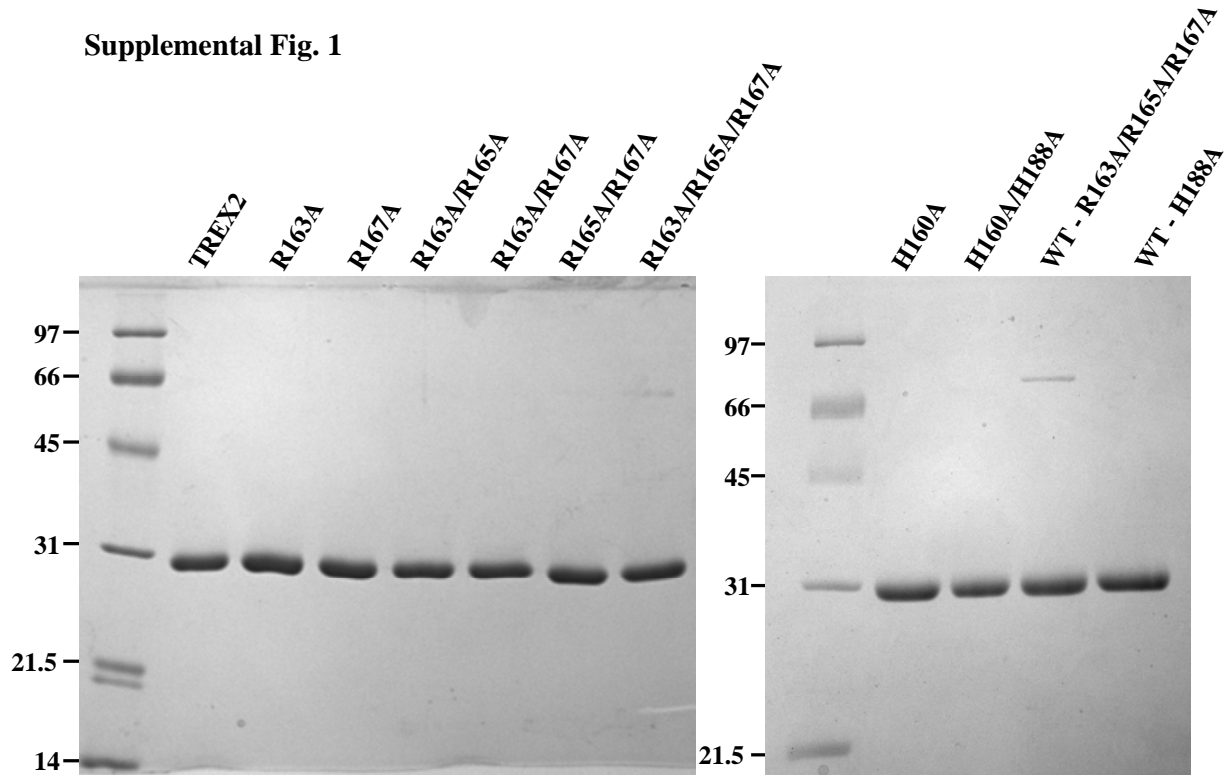

**Supplementary Figure 1. Preparation of TREX2 and variants** - The plasmid constructs used to express the human TREX2 and variants in *E. coli* and purification of the enzymes has been described (1-3). Enzymes are stored at ~0.5 mg/ml in aliquots at -80 °C. The TREX2 concentrations were determined by  $A_{280}$  as described in the text.

Supplemental Fig. 2

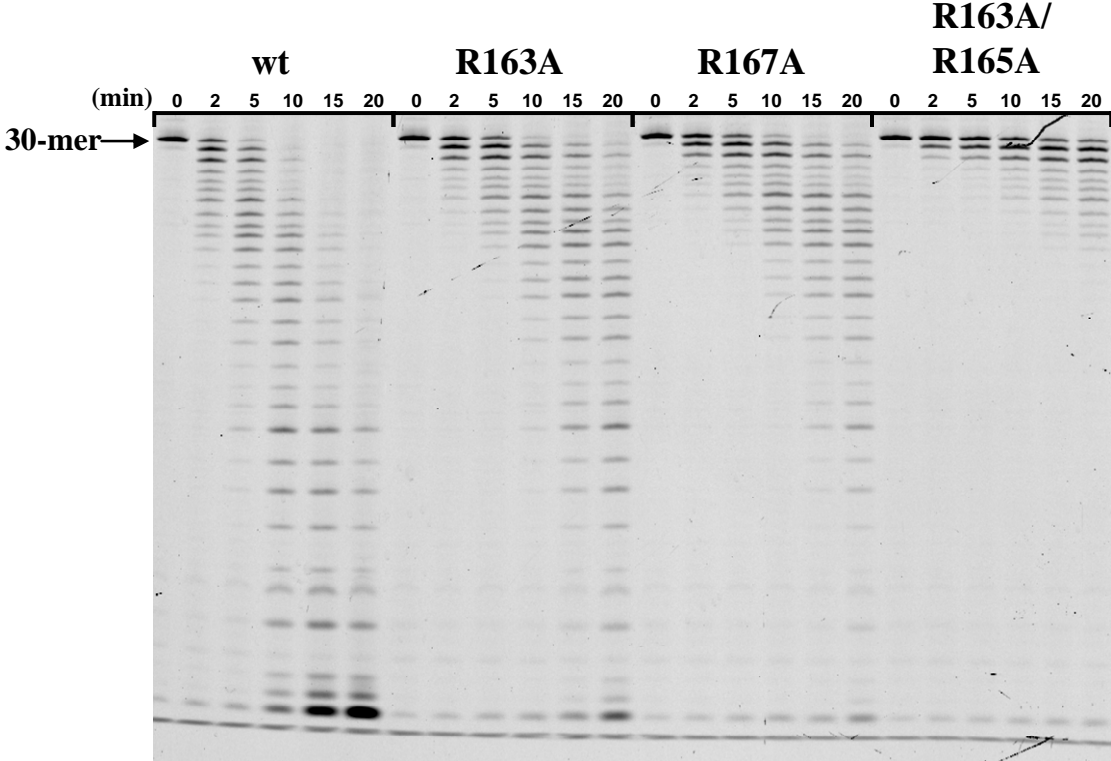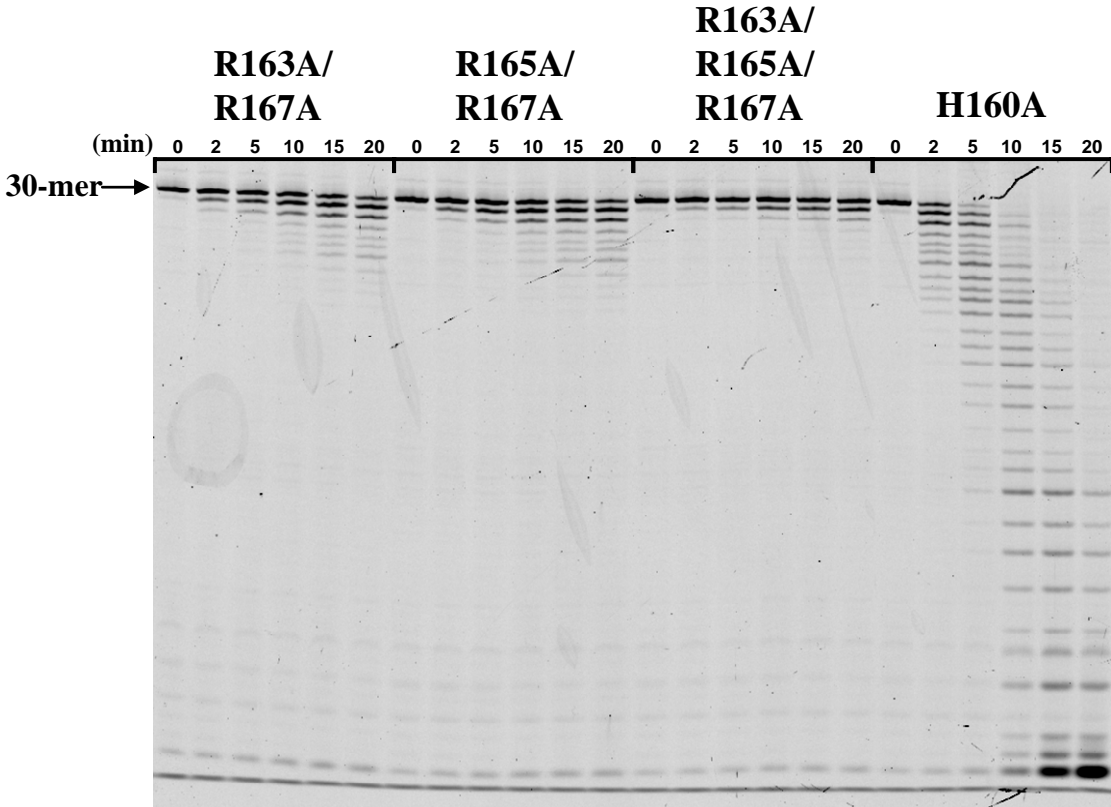

**Supplementary Figure 2.** Time course reactions (210 $\mu$ l) were prepared as described in the text containing 50 nM FAM-labeled ssDNA 30-mer oligonucleotide and 380 pM TREX2 enzyme. Samples (30  $\mu$ l) were removed after incubation at 25°C for 2, 5, 10, 15, and 20 minutes, quenched by addition of 90  $\mu$ l of cold ethanol and dried in vacuo. Pellets were resuspended in 6  $\mu$ l of formamide, heated to 95°C for 2 min, and separated on 23% denaturing polyacrylamide gels. FAM-labeled oligonucleotide bands were visualized and quantified using a Storm phosphorimager (Molecular Dynamics). The amount of dNMP product was calculated as described in the text. The position of migration of the 30-mer is indicated.

Supplemental Fig. 3

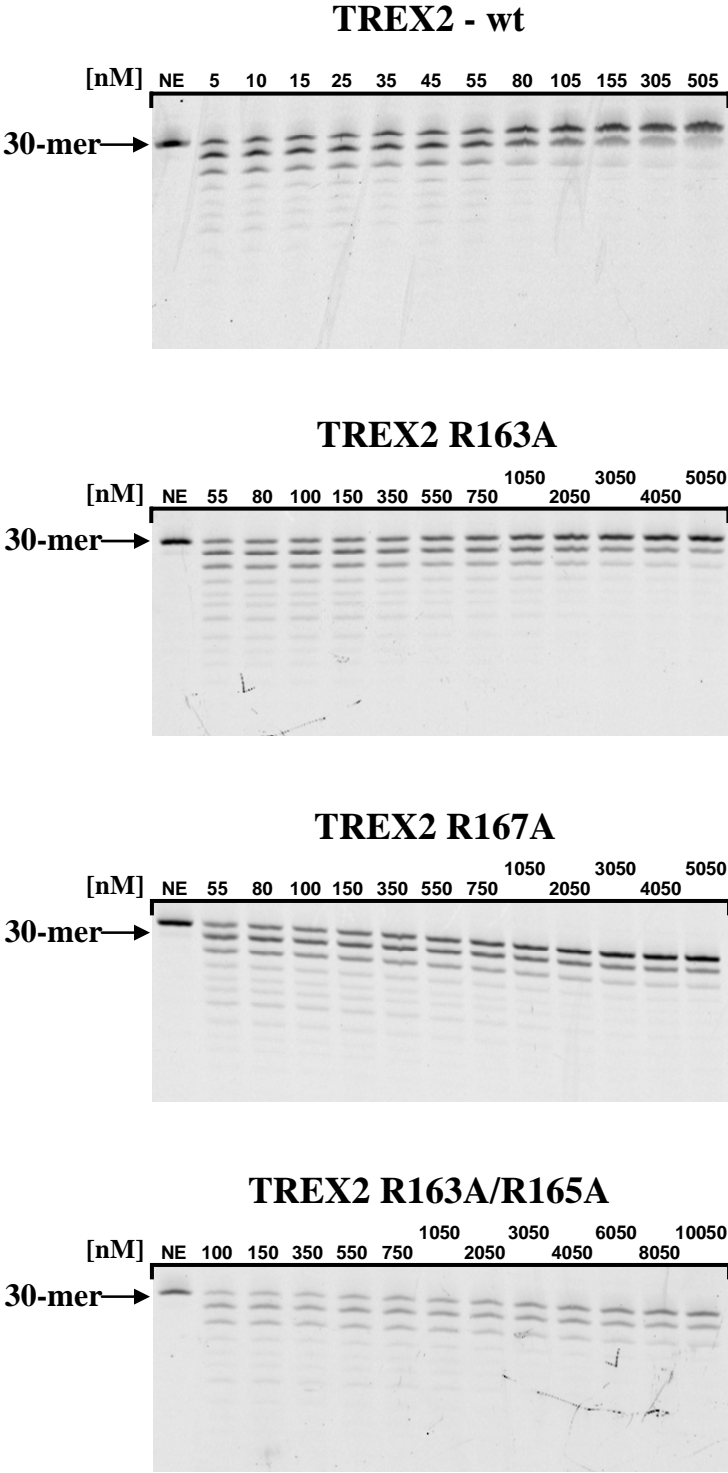

**Supplemental Fig. 3 (cont)**

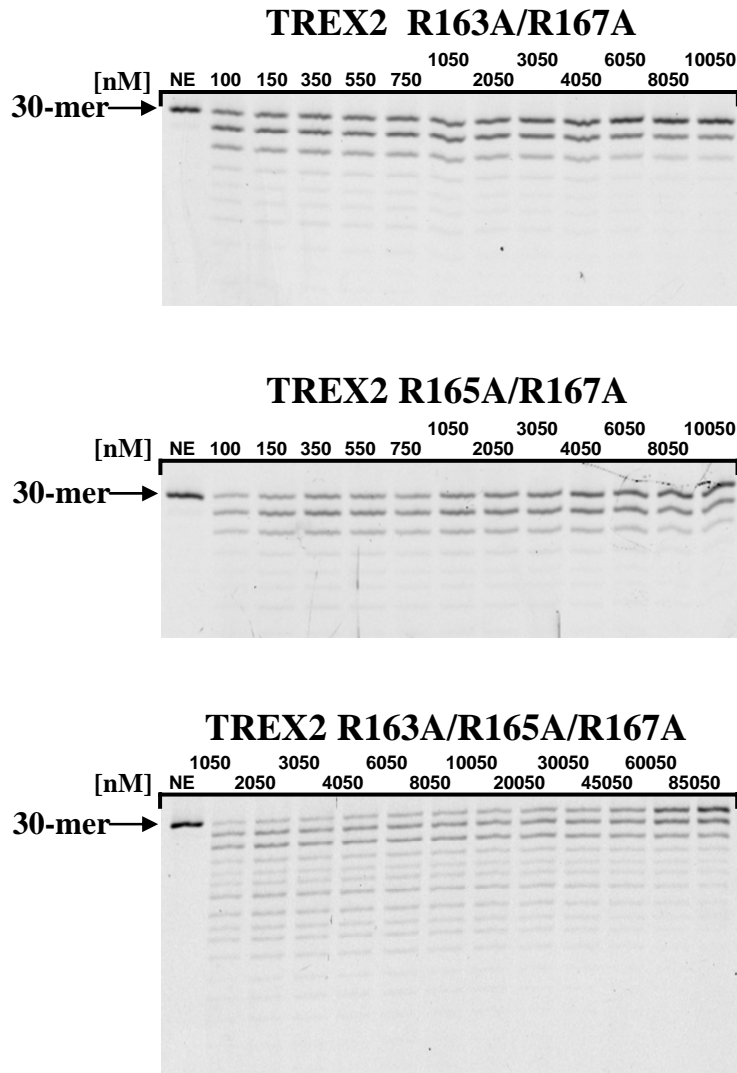

**Supplementary Figure 3.** Steady-state kinetic reactions (10 $\mu$ l or (50 $\mu$ l for wt)) were prepared as described in the text containing the indicated concentration of FAM-labeled ssDNA 30-mer oligonucleotide and 38 pM TREX2<sup>wt</sup>, 76 pM TREX2<sup>R163A</sup> or TREX2<sup>R167A</sup>, 380 pM TREX2<sup>R163A-R165A</sup>, TREX2<sup>R163A-R167A</sup>, or TREX2<sup>R165A-R167A</sup> and 1500 pM TREX2<sup>R163A-R165A-R167A</sup> enzyme. Incubations were 20 min at 25°C. Reaction products were processed and quantified as described in the text. Kinetic constants were determined by regression analysis using SigmaPlot 8.02 (SPSS Science, Inc.).

## REFERENCES

1. Perrino, F. W., Krol, A., Harvey, S., Zheng, S. L., Horita, D. A., Hollis, T., Meyers, D. A., Isaacs, W. B., and Xu, J. F. (2004) in *Advances in Enzyme Regulation, Vol 44* Vol. 44, pp. 37-49
2. Perrino, F. W., Harvey, S., McMillin, S., and Hollis, T. (2005) *J. Biol. Chem.* **280**, 15212-15218
3. Lee-Kirsch, M. A., Chowdhury, D., Harvey, S., Gong, M., Senenko, L., Engel, K., Pfeiffer, C., Hollis, T., Gahr, M., Perrino, F. W., Lieberman, J., and Hubner, N. (2007) *J Mol Med* **85**, 531-537
